# Supplementary material
Source: publisher site journal article supplement (https://www.dovepress.com/article/226783)
Supplement: Supplementary file 1 [file get_supplementary_file.php]

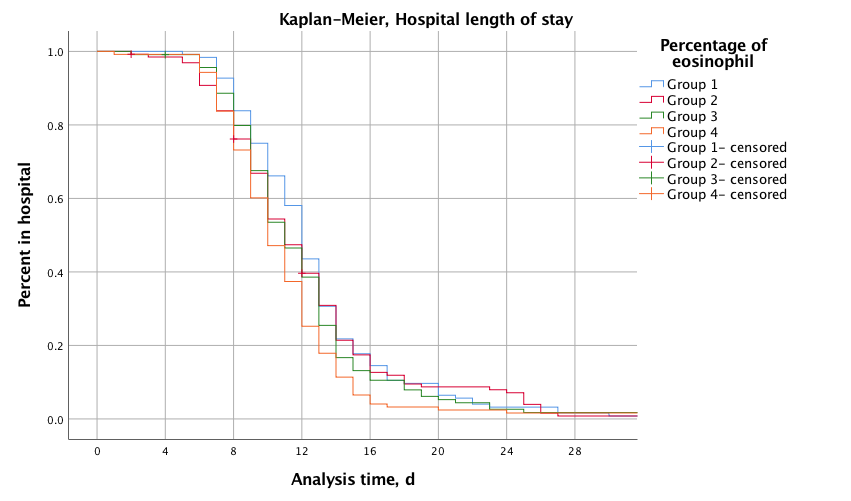


Figure S1 Hospital length of stay according to quartile-percentage of eosinophil cohorts. Kaplan-

Meier analysis of length of hospital stay in quartile-percentage of eosinophil cohorts.


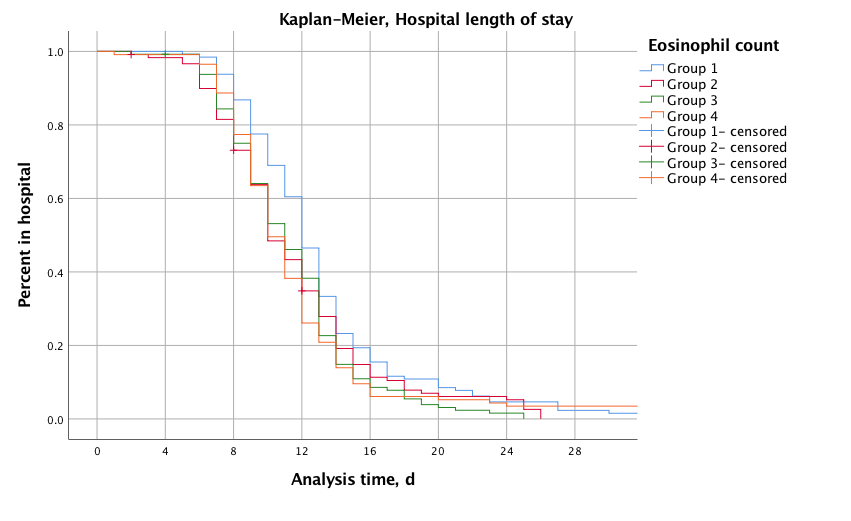


Figure S2 Hospital length of stay according to quartile-count of eosinophil cohorts. Kaplan-

Meier analysis of length of hospital stay in quartile-count of eosinophil cohorts.


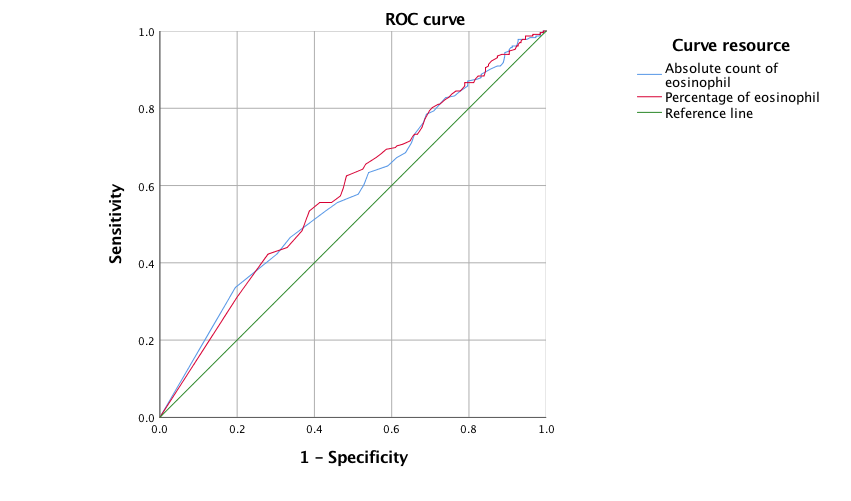


Figure S3 The receiver operating characteristic (ROC) curve analysis for length of hospital stay of peripheral blood eosinophil.

|  | | | | | | |
| --- | --- | --- | --- | --- | --- | --- |
| Percentage of eosinophil | 25.0% | | 50.0% | | 75.0% | |
| Estimate | Std. Error | Estimate | Std. Error | Estimate | Std. Error |
| 1 | 14.000 | 0.574 | 12.000 | 0.307 | 9.000 | 0.438 |
| 2 | 14.000 | 0.540 | 11.000 | 0.485 | 9.000 | 0.486 |
| 3 | 14.000 | 0.318 | 11.000 | 0.484 | 9.000 | 0.417 |
| 4 | 13.000 | 0.354 | 10.000 | 0.395 | 8.000 | 0.339 |
| Overall | 14.000 | 0.184 | 11.000 | 0.243 | 9.000 | 0.214 |

Table S1 Quartiles for hospital length of stay in percentage of peripheral blood eosinophil cohorts.

|  | | | |
| --- | --- | --- | --- |
|  | Chi-Square | df | Sig. |
| Log Rank (Mantel-Cox) | 9.542 | 3 | 0.023 |
| Breslow (Generalized Wilcoxon) | 11.470 | 3 | 0.009 |
| Tarone-Ware | 11.702 | 3 | 0.008 |

Table S2 Overall Comparison of hospital length of stay in percentage of peripheral blood eosinophil cohorts.

|  | | | | | | |
| --- | --- | --- | --- | --- | --- | --- |
| Group | 25.0% | | 50.0% | | 75.0% | |
| Estimate | Std. Error | Estimate | Std. Error | Estimate | Std. Error |
| 1 | 14.000 | 0.533 | 12.000 | 0.324 | 10.000 | 0.457 |
| 2 | 14.000 | 0.466 | 10.000 | 0.451 | 8.000 | 0.458 |
| 3 | 13.000 | 0.316 | 11.000 | 0.513 | 8.000 | 0.377 |
| 4 | 13.000 | 0.467 | 10.000 | 0.370 | 9.000 | 0.356 |
| Overall | 14.000 | 0.184 | 11.000 | 0.243 | 9.000 | 0.214 |

Table S3 Quartiles for hospital length of stay in absolute count of peripheral blood eosinophil cohorts.

|  | | | |
| --- | --- | --- | --- |
|  | Chi-Square | df | sig. |
| Log Rank (Mantel-Cox) | 8.633 | 3 | 0.035 |
| Breslow (Generalized Wilcoxon) | 12.777 | 3 | 0.005 |
| Tarone-Ware | 11.701 | 3 | 0.008 |

Table S4 Overall Comparison of hospital length of stay in absolute count of peripheral blood eosinophil cohorts.

| Variable | AUC | Std. Error | Progressive Sig. | Progressive 95% CI | |
| --- | --- | --- | --- | --- | --- |
| Lower | Upper |
| Percentage of eosinophil | 0.585 | 0.026 | 0.001 | 0.535 | 0.635 |
| Absolute count of eosinophil | 0.579 | 0.026 | 0.003 | 0.528 | 0.629 |

Table S5 The area under the curve (AUC) for length of hospital stay of peripheral blood eosinophil.

| Groups |  | Eosinophil < 2% | Eosinophil ≥2% | P value |
| --- | --- | --- | --- | --- |
| Participants, n |  | 342 | 151 | - |
| Stay of hospital, median (IQR) |  | 11(9-14) | 11(9-13) | 0.036 |
| ICU admission, n (%) |  | 5(1.5) | 1(0.7) | 0.672* |
| Mortality, n (%) |  | 5(1.5) | 1(0.7) | 0.672* |
| Comorbidity, n (%) | Cardiovascular disease | 263(76.9) | 108(71.5) | 0.202 |
|  | Ischemic heart disease | 52(18.4) | 21(13.9) | 0.230 |
|  | Heart failure | 145(45.4) | 43(28.5) | 0.003 |
|  | Hypertension | 143(41.8) | 64(42.4) | 0.906 |
|  | Peripheral vascular disease | 42(12.3) | 21(13.9) | 0.618 |
|  | Arrhythmia | 56(16.4) | 22(14.6) | 0.630 |
|  | Diabetes | 59(17.3) | 22(14.6) | 0.459 |
|  | Bronchiectasis | 64(18.4) | 23(15.2) | 0.350 |
|  | Respiratory failure | 163(47.7) | 51(33.8) | 0.004 |
|  | Pulmonary heart disease | 150(43.9) | 53(35.1) | 0.068 |
| Mechanical ventilation, n (%) | NIMV | 111(32.5) | 36(23.8) | 0.054 |
|  | IMV | 3(0.9) | 1(0.7) | 1.000 |
|  | Duration of NIMV | 0(0-128.25) | 0(0) | 0.071 |

Table S6 Comparison of clinical outcomes of hospitalized AECOPD classified by percentage of peripheral blood eosinophil ≥2%. IQR, interquartile range: 25%–75%; *, Fisher's exact probability method; n, number; ICU, intensive care unit; NIMV, noninvasive mechanical ventilation; IMV, invasive mechanical ventilation.

|  |  | Eosinophil < 100cell/ul | Eosinophil ≥ 100 cell/ul | P value |
| --- | --- | --- | --- | --- |
| Participants, n |  | 316 | 177 | - |
| Stay of hospital, median (IQR) |  | 11(9-14) | 11(8.5-13) | 0.053 |
| ICU admission, n (%) |  | 5(1.6) | 1(0.6) | 0.472* |
| Mortality, n (%) |  | 4(1.3) | 2(1.1) | 1.000* |
| Comorbidity, n (%) | Cardiovascular disease | 246(77.8) | 125(70.6) | 0.074 |
|  | Ischemic heart disease | 47(14.9) | 26(14.7) | 0.956 |
|  | Heart failure | 134(42.4) | 54(30.5) | 0.009 |
|  | Hypertension | 133(42.1) | 74(41.8) | 0.952 |
|  | Peripheral vascular disease | 39(12.3) | 24(13.6) | 0.698 |
|  | Arrhythmia | 52(16.5) | 26(14.7) | 0.606 |
|  | Diabetes | 54(17.1) | 27(15.3) | 0.598 |
|  | Bronchiectasis | 59(18.7) | 28(15.8) | 0.426 |
|  | Respiratory failure | 152(48.1) | 62(35.0) | 0.005 |
|  | Pulmonary heart disease | 143(45.3) | 60(33.9) | 0.014 |
| Mechanical ventilation, n (%) | NIMV | 106(33.5) | 41(23.2) | 0.016 |
|  | IMV | 3(0.9) | 1(0.6) | 1.000 |
|  | Duration of NIMV | 0(0-141.5) | 0(0) | 0.020 |

Table S7 Comparison of clinical outcomes of hospitalized AECOPD classified by absolute count of peripheral blood eosinophil ≥ 100 /µL.IQR, interquartile range: 25%–75%; *, Fisher's exact probability method; n, number; ICU, intensive care unit; NIMV, noninvasive mechanical ventilation; IMV, invasive mechanical ventilation.

|  |  | Eosinophil < 300cell/ul | Eosinophil ≥ 300 cell/ul | P value |
| --- | --- | --- | --- | --- |
| Participants, n |  | 450 | 43 | - |
| Stay of hospital, median (IQR) |  | 11(9-14) | 11(8-13) | 0.172 |
| ICU admission, n (%) |  | 5(1.1) | 1(2.3) | 0.423* |
| Mortality, n (%) |  | 6(1.3) | 0(0) | 1.000* |
| Comorbidity, n (%) | Cardiovascular disease | 342(76.0) | 29(60.4) | 0.214 |
|  | Ischemic heart disease | 67(14.9) | 6(14.0) | 0.869 |
|  | Heart failure | 178(39.6) | 10(23.3) | 0.036 |
|  | Hypertension | 186(41.3) | 21(48.8) | 0.341 |
|  | Peripheral vascular disease | 56(12.4) | 7(16.3) | 0.472 |
|  | Arrhythmia | 73(16.2) | 5(11.6) | 0.430 |
|  | Diabetes | 75(16.7) | 6(14) | 0.646 |
|  | Bronchiectasis | 81(18) | 6(14) | 0.506 |
|  | Respiratory failure | 200(44.4) | 14(32.6) | 0.133 |
|  | Pulmonary heart disease | 193(42.9) | 10(23.3) | 0.012 |
| Mechanical ventilation, n (%) | NIMV | 138(30.7) | 9(20.9) | 0.182 |
|  | IMV | 3(0.7) | 1(2.3) | 0.307 |
|  | Duration of NIMV | 0(0-110) | 0(0) | 0.018 |

Table S8 Comparison of clinical outcomes of hospitalized AECOPD classified by absolute count of peripheral blood eosinophil ≥ 300 /µL.IQR, interquartile range: 25%–75%; *, Fisher's exact probability method; n, number; ICU, intensive care unit; NIMV, noninvasive mechanical ventilation;

IMV, invasive mechanical ventilation.

| Model |  | Collinearity diagnosis a | | |
| --- | --- | --- | --- | --- |
| Tolerance | | VIF |
| 1 | Neutrophil % | 0.719 | | 1.390 |
|  | Eosinophil % | 0.719 | | 1.390 |
| 2 | Neutrophil count | 0.972 | | 1.029 |
|  | Eosinophil count | 0.972 | | 1.029 |
| 3 | Neutrophil % | 0.816 | | 1.226 |
|  | Eosinophil count | 0.816 | | 1.226 |
| 4 | Neutrophil count | 0.899 | | 1.112 |
|  | Eosinophil % | 0.899 | | 1.112 |
| a. Variable：stay of hospital | | |

Table S9 Collinearity diagnosis of the eosinophil count, neutrophil count, percentage of eosinophil and neutrophil variable on stay of hospital.
